# Supplementary material for: In vitro downregulated hypoxia transcriptome is associated with poor prognosis in breast cancer
Source: PubMed Central journal article supplement (PMC5472949; doi:10.1186/s12943-017-0673-0), 2017-06-15

**C1 (504 genes)****C2 (598 genes)****D01**  
Hypoxia MCF7  
(except points  
1 and 3)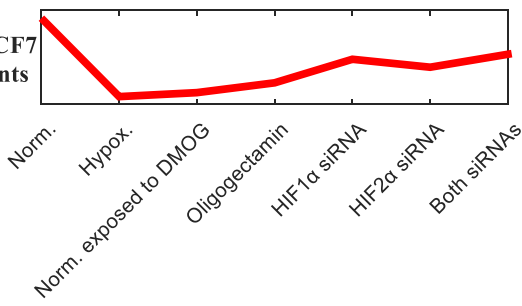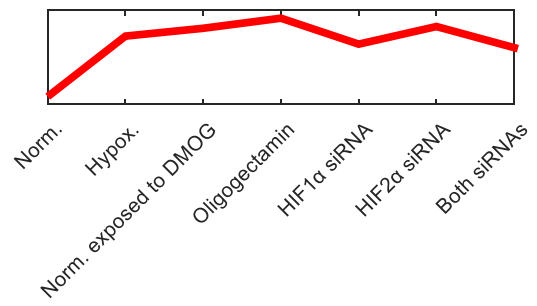**D02**  
Hypoxia MCF7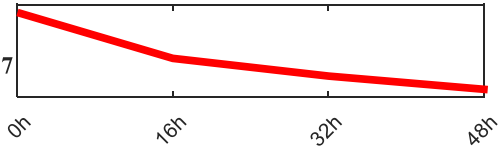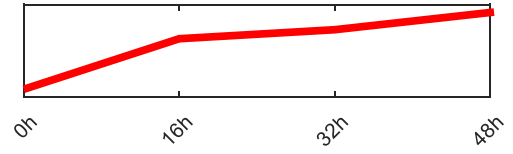**D03**  
Hypoxia MCF7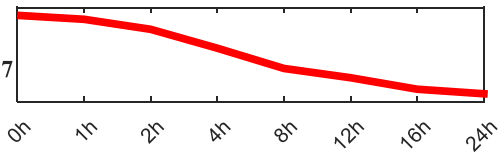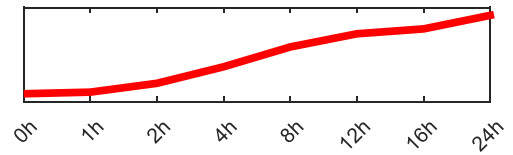**D04**  
MCF7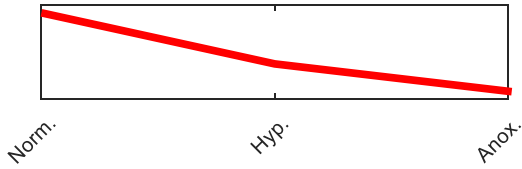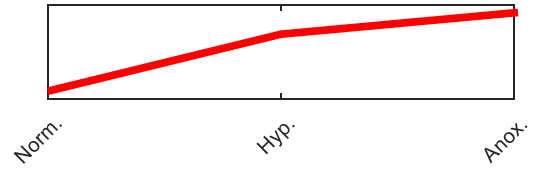**D05**  
Hypoxia  
MDA-MB-231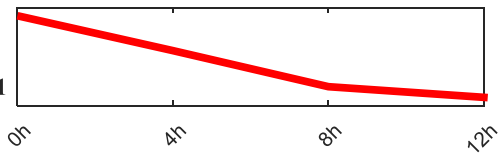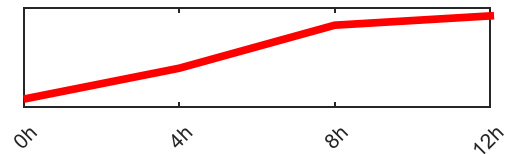**D06**  
MCF7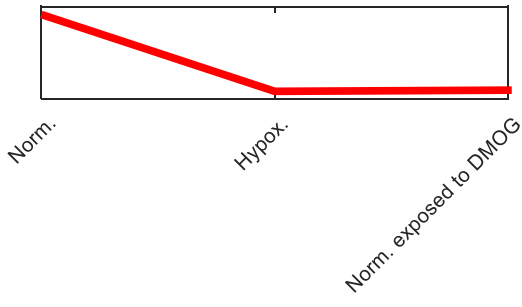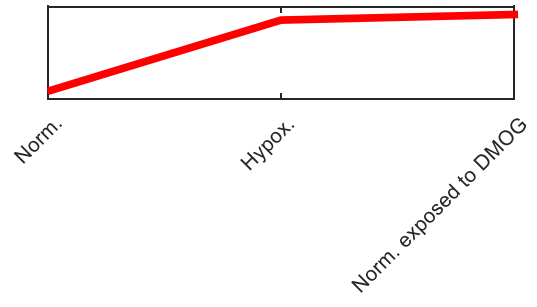**D07**  
Hypoxia SCP2  
subline of  
MDA-MB-231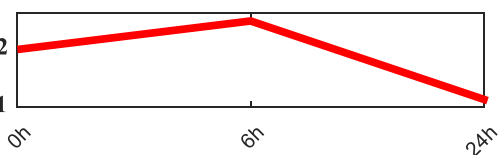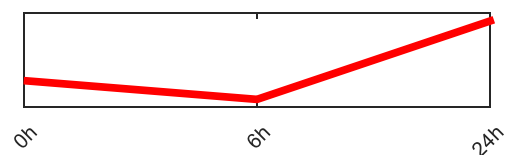**D08**  
Hypoxia LM2  
subline of  
MDA-MB-231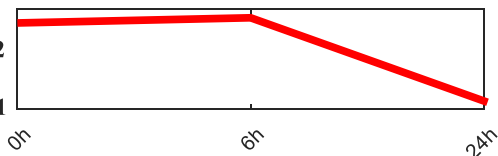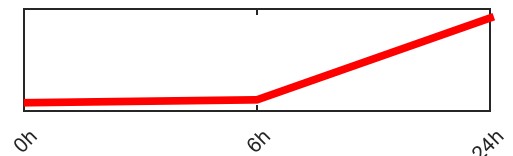**D09**  
MCF7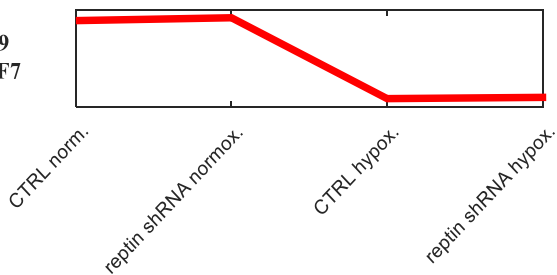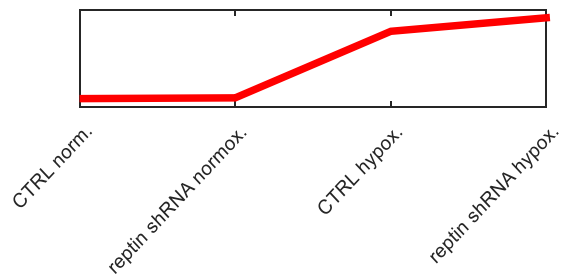

**C1 (504 genes)****C2 (598 genes)****D10**  
Derived from  
MDA-MB-231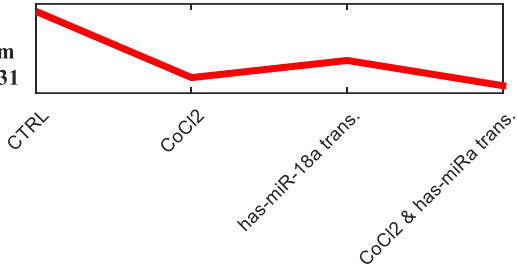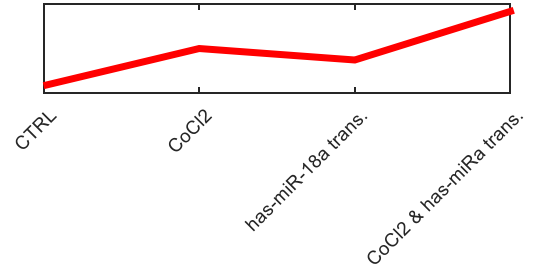**D11**  
MCF7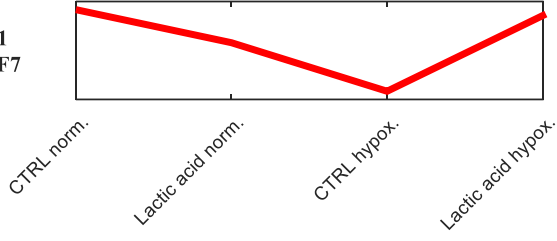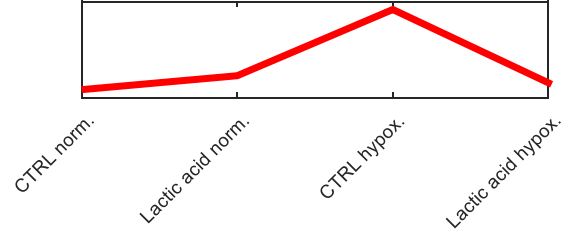**D12**  
MCF7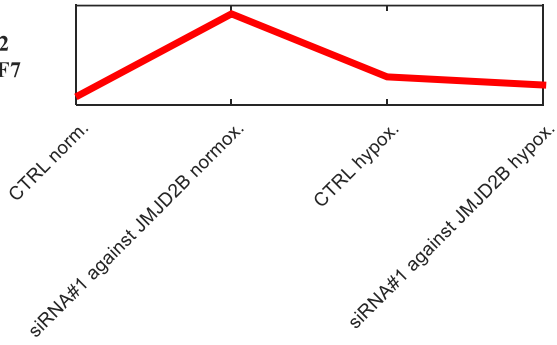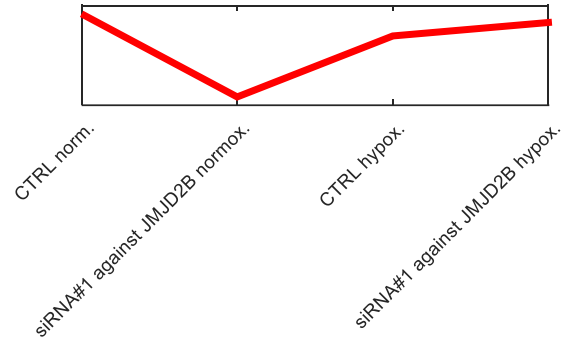**D13**  
Hypoxia MCF7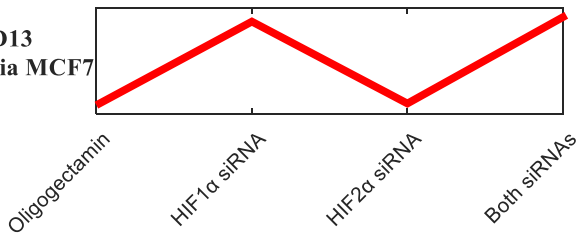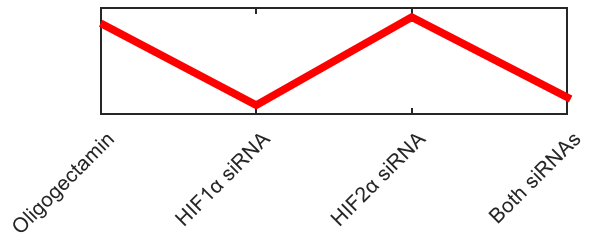**D14**  
Hypoxia  
MCF7/ZR-75-1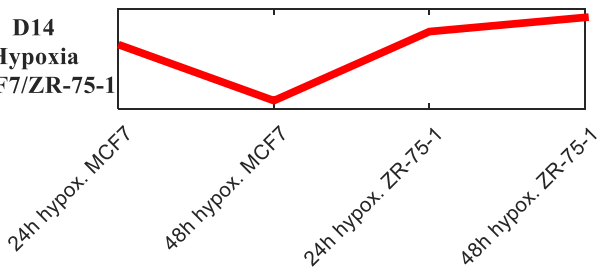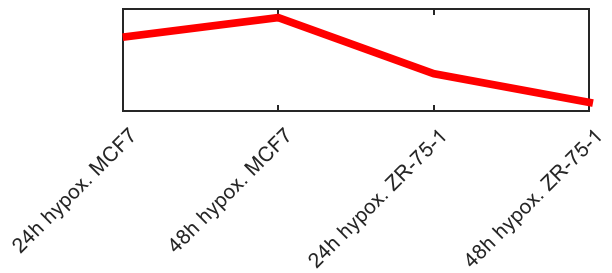**D15**  
Hypoxia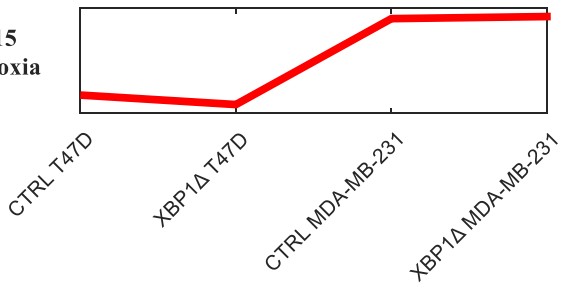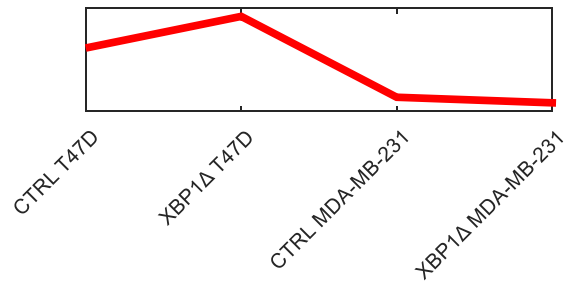**D16**  
Reoxygenation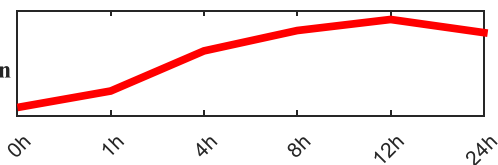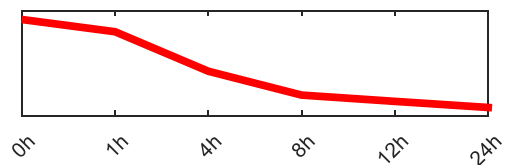

Supplement: 12943_2017_673_MOESM2_ESM.pdf [file 12943_2017_673_MOESM2_ESM.pdf]
