# Supplementary material for: In vitro downregulated hypoxia transcriptome is associated with poor prognosis in breast cancer
Source: PubMed Central journal article supplement (PMC5472949; doi:10.1186/s12943-017-0673-0), 2017-06-15

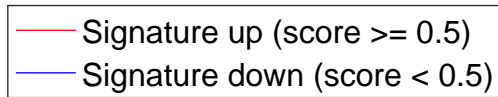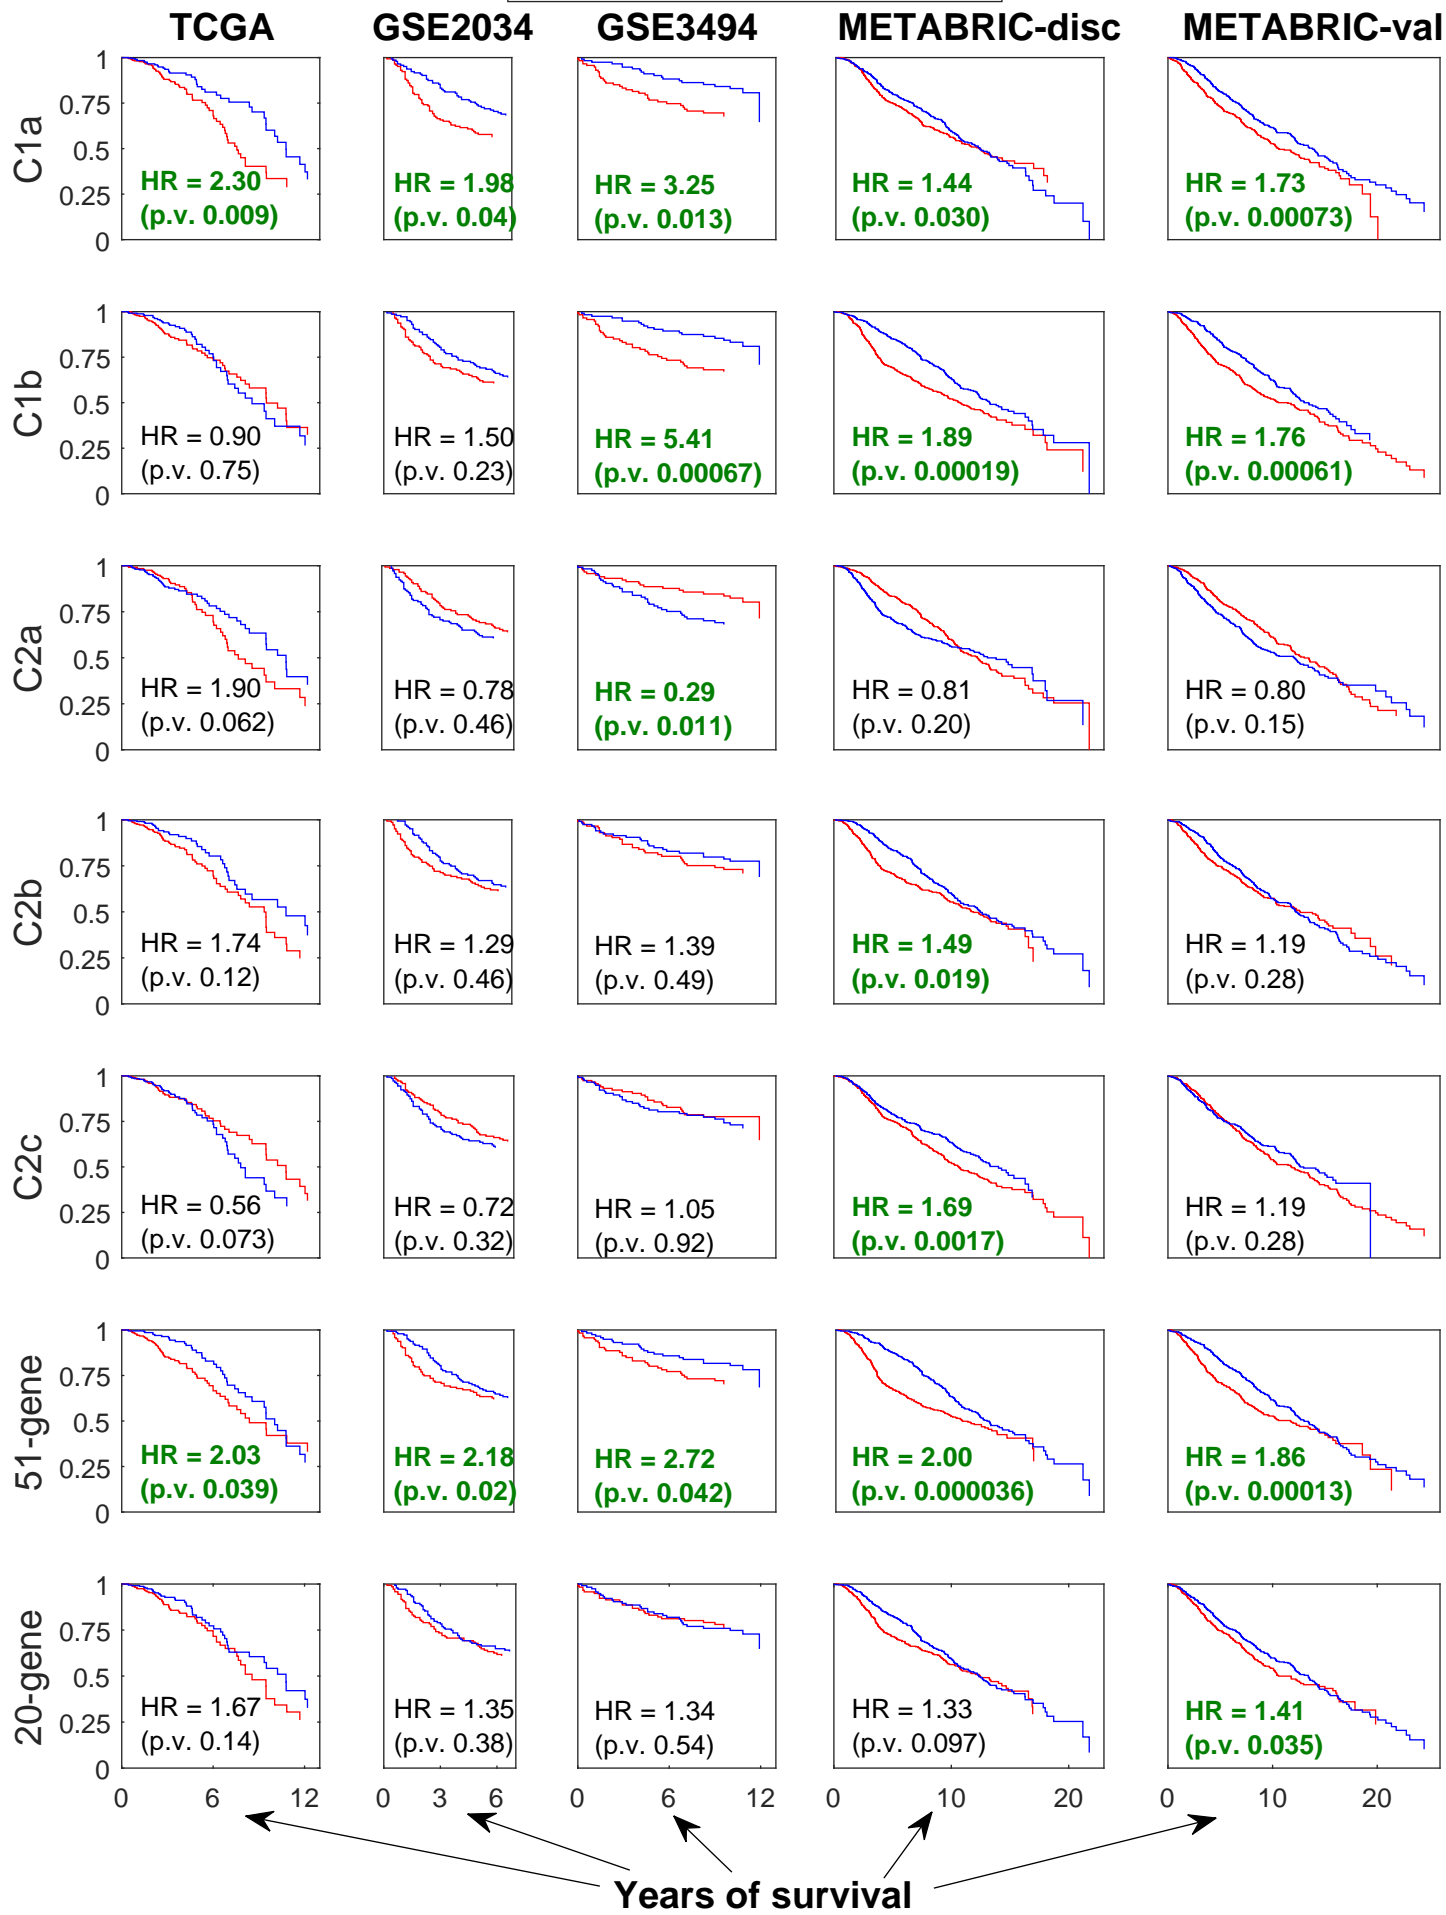

Supplement: 12943_2017_673_MOESM8_ESM.pdf [file 12943_2017_673_MOESM8_ESM.pdf]
